# Supplementary material for: Point defects and their impact on electrochemical performance in Na0.44MnO2 for sodium-ion battery cathode application
Source: Royal Society of Chemistry journal article supplement (doi:10.1039/d2cp03199j), 2022-01-01
Supplement: d2cp03199j1.pdf [file d2cp03199j1.pdf]

## Supporting Information – Point defects and their impact on electrochemical performance in Na<sub>0.44</sub>MnO<sub>2</sub> for sodium-ion battery cathode application

Chung-Hyok Rim, Chol-Hun Jang, Kwang-Han Kim, Chol Ryu, Chol-Jun Yu\*

*Chair of Computational Materials Design (CMD), Faculty of Materials Science, Kim Il Sung University,  
Pyongyang, PO Box 76, Democratic People's Republic of Korea*

Table S1. Pseudopotential file name, valence electron configuration, phase, and binding energy per atom. Values in parenthesis are experimental ones [1].

| Element | Pseudopotential      | Configuration              | Phase | $E_{\text{bind}}$ (eV/atom) |
|---------|----------------------|----------------------------|-------|-----------------------------|
| O       | O.pbe-van_ak.UPF     | $2s^2 2p^4$                | gas   | -5.0618 (-5.12)             |
| Li      | Li.pbe-s-van_ak.UPF  | $1s^2 2s^{0.95} 2p^{0.05}$ | bcc   | -1.9267                     |
| Na      | Na.pbe-sp-van_ak.UPF | $2s^2 2p^6 3s^1$           | bcc   | -1.3131                     |
| K       | K.pbe-sp-van.UPF     | $3s^2 3p^6 4s^1$           | bcc   | -1.0667                     |
| Rb      | rb_pbe_v1.uspp.F.UPF | $4s^2 4p^6 5s^{0.5}$       | bcc   | -0.9869                     |
| Mn      | Mn.pbe-sp-van.UPF    | $3s^2 3p^6 4s^2 3d^5$      | fcc   | -4.3100                     |

\*Corresponding author: Chol-Jun Yu, Email: cj.yu@ryongnamsan.edu.kp

Table S2. Crystal system, space group, and formation energy per  $O_2$  of binary metal oxides, calculated by  $E_{\text{form}}(M_aO_b) = [E_{\text{tot}}(M_aO_b) - aE_{\text{tot}}(M) - b/2E_{\text{tot}}(O_2)] \cdot 2/b$ , where  $E_{\text{tot}}(M)$  is the total energy of elementary metal per atom and  $E_{\text{tot}}(O_2)$  is the total energy of isolated  $O_2$  molecule. Experimental values are from Ref. [2].

| Compound                       | Structure    | Space group  | $E_{\text{form}}$ (eV/ $O_2$ ) |          |
|--------------------------------|--------------|--------------|--------------------------------|----------|
|                                |              |              | Cal.                           | Exp.     |
| Superoxide                     |              |              |                                |          |
| LiO <sub>2</sub>               | cubic        | $Fm\bar{3}m$ | -0.7190                        |          |
| NaO <sub>2</sub>               | cubic        | $Fm\bar{3}m$ | -3.2784                        | -2.6950  |
|                                | orthorhombic | $Pnmm$       | -3.3774                        |          |
|                                | cubic        | $Pa\bar{3}$  | -3.3808                        |          |
|                                | hexagonal    | $R\bar{3}m$  | -3.3541                        |          |
| KO <sub>2</sub>                |              | $C12c1$      | -3.4561                        | -2.9508  |
|                                |              | $F4mmm$      | -3.5229                        |          |
|                                |              | $I4mmm$      | -2.8962                        |          |
| RbO <sub>2</sub>               | cubic        | $I4mmm$      | -3.4507                        | -2.8866  |
|                                |              | $Fm\bar{3}m$ | 0.2057                         |          |
| Peroxide                       |              |              |                                |          |
| Li <sub>2</sub> O <sub>2</sub> | hexagonal    | $P6_3/mmc$   | -5.4927                        | -6.5697  |
| Na <sub>2</sub> O <sub>2</sub> | hexagonal    | $P62m$       | -4.1395                        | -5.2916  |
| K <sub>2</sub> O <sub>2</sub>  |              | $Cmca$       | -3.8183                        | -5.1176  |
| Rb <sub>2</sub> O <sub>2</sub> |              | $Immm$       | -3.5259                        | -4.8887  |
| Oxide                          |              |              |                                |          |
| Li <sub>2</sub> O              | cubic        | $Fm\bar{3}m$ | -10.3643                       | -12.3854 |
|                                | hexagonal    | $R\bar{3}mh$ | -10.4348                       |          |
| Na <sub>2</sub> O              | cubic        | $Fm\bar{3}m$ | -6.4193                        | -8.5801  |
| K <sub>2</sub> O               | cubic        | $Fm\bar{3}m$ | -4.8546                        | -7.4884  |
| Rb <sub>2</sub> O              | cubic        | $Fm\bar{3}m$ | -4.0629                        | -7.0224  |
| MnO                            | cubic        | $Fm\bar{3}m$ | -7.2104                        | -7.9794  |
| MnO <sub>2</sub>               | tetragonal   | $I4m$        | -5.2900                        | -5.3859  |
|                                | tetragonal   | $P4_2/mnm$   | -6.3663                        |          |
|                                | orthorhombic | $Pbnm$       | -6.1844                        |          |
|                                | orthorhombic | $Pnam$       | -6.1835                        |          |
| Mn <sub>2</sub> O <sub>3</sub> | cubic        | $I213$       | -7.1037                        | -6.6219  |
|                                | cubic        | $IA_3$       | -7.0121                        |          |
|                                | orthorhombic | $Pbca$       | -7.0114                        |          |
| Mn <sub>3</sub> O <sub>4</sub> | tetragonal   | $I4_1/amd$   | -7.5976                        | -7.1870  |
|                                | orthorhombic | $Pbcm$       | -6.9005                        |          |
|                                | orthorhombic | $Pmab$       | -6.9033                        |          |

Table S3. Crystal system with space group and formation energy of sodium oxides calculated using oxygen gas and sodium metal as two end materials, and corrected formation energy.  $E_{\text{form}} = \frac{1}{a+b}E_{\text{tot}}(M_aO_b) - [xE_{\text{tot}}(M) - (1-x)E_{\text{tot}}(O_2)]/2$ , where  $x = a/(a+b)$ . The correcting term  $E_{\text{corr}}$  is determined from  $E_{\text{corr}}^0$  shown in Fig. S1 by using the relation  $E_{\text{corr}} = E_{\text{corr}}^0(1-x)/2$ , and then, the corrected formation energy is obtained by  $E_{\text{form}}^{\text{corr}} = E_{\text{form}} - E_{\text{corr}}$ .

| $M_aO_b$                       | phase                      | $a$ | $b$ | $x = a/(a+b)$ | $E_{\text{form}}$ (eV) | $E_{\text{corr}}$ (eV) | $E_{\text{form}}^{\text{corr}}$ (eV) |
|--------------------------------|----------------------------|-----|-----|---------------|------------------------|------------------------|--------------------------------------|
| O <sub>2</sub>                 | gas                        | 0   | 2   | 0.0           | 0.0000                 |                        | 0.0000                               |
| NaO <sub>3</sub>               | orthorhombic ( $Imm2$ )    | 1   | 3   | 1/4           | -0.6816                |                        | -0.6816                              |
| NaO <sub>2</sub>               | cubic ( $Fm\bar{3}m$ )     | 1   | 2   | 1/3           | -1.1270                | -0.2025                | -0.9245                              |
|                                | orthorhombic ( $Pnmm$ )    |     |     |               | -1.0928                |                        | -0.8904                              |
|                                | cubic ( $P\bar{a}3$ )      |     |     |               | -1.1180                |                        | -0.9156                              |
|                                | hexagonal ( $R\bar{3}m$ )  |     |     |               | -1.1258                |                        | -0.9233                              |
| Na <sub>2</sub> O <sub>2</sub> | hexagonal ( $P\bar{6}2m$ ) | 2   | 2   | 1/2           | -1.0349                | 0.3057                 | -1.3406                              |
| Na <sub>2</sub> O              | cubic ( $Fm\bar{3}m$ )     | 2   | 1   | 2/3           | -1.0699                | 0.2038                 | -1.2737                              |
| Na                             | cubic ( $bcc$ )            | 1   | 0   | 1.0           | 0.0000                 |                        | 0.0000                               |

Table S4. Crystal system with space group, total energy, and formation energy of titanium oxides calculated using oxygen gas and titanium metal as two end materials.  $E_{\text{form}} = \frac{1}{a+b}E_{\text{tot}}(\text{M}_a\text{O}_b) - [xE_{\text{tot}}(\text{M}) - (1-x)E_{\text{tot}}(\text{O}_2)/2]$ , where  $x = a/(a+b)$ .

| $\text{M}_a\text{O}_b$  | phase                     | $a$ | $b$ | $x = a/(a+b)$ | $E_{\text{form}}$ (eV) |
|-------------------------|---------------------------|-----|-----|---------------|------------------------|
| $\text{O}_2$            | gas                       | 0   | 2   | 0.0           | 0.0000                 |
| $\text{Mn}_2\text{O}_7$ | monoclinic ( $P2_1/c$ )   | 2   | 7   | 0.2222        | -0.6230                |
| $\text{MnO}_2$          | monoclinic ( $C12/m1$ )   | 1   | 2   | 0.3333        | -1.7233                |
|                         | tetragonal ( $I4m$ )      | 1   | 2   | 0.3333        | -1.5574                |
|                         | tetragonal ( $P42mnm$ )   | 1   | 2   | 0.3333        | -1.5571                |
|                         | orthorhombic ( $Pbnm$ )   | 1   | 2   | 0.3333        | -1.6732                |
| $\text{Mn}_5\text{O}_8$ | monoclinic ( $C12/m1$ )   | 5   | 8   | 0.3846        | -1.9057                |
| $\text{Mn}_2\text{O}_3$ | orthorhombic ( $Pbca$ )   | 2   | 3   | 0.4000        | -2.1311                |
|                         | cubic ( $IA_3$ )          | 2   | 3   | 0.4000        | -2.1044                |
|                         | cubic ( $I213$ )          | 2   | 3   | 0.4000        | -2.1041                |
| $\text{Mn}_3\text{O}_4$ | tetragonal ( $I4_1/amd$ ) | 3   | 4   | 0.4286        | -2.1707                |
|                         | orthorhombic ( $Pbcm$ )   | 3   | 4   | 0.4286        | -2.0429                |
|                         | orthorhombic ( $Pmab$ )   | 3   | 4   | 0.4286        | -2.0437                |
| $\text{MnO}$            | cubic ( $Fm\bar{3}m$ )    | 1   | 1   | 0.5000        | -1.9087                |
| $\text{Mn}$             | cubic ( $fcc$ )           | 1   | 0   | 1.0           | 0.0000                 |

Table S5. Space group, elementary formation energy per atom from bcc Na metal, fcc Mn metal and  $\text{O}_2$  gas ( $E_f^{\text{el}}$ ), and formation reaction and energy ( $E_f^{\text{bi}}$ ) from binary oxides for Na–Mn–O system.

| Compound                              | Space group | $E_f^{\text{el}}$ (eV) | Binary oxides                                       |                        |
|---------------------------------------|-------------|------------------------|-----------------------------------------------------|------------------------|
|                                       |             |                        | Reaction                                            | $E_f^{\text{bi}}$ (eV) |
| $\text{Na}_{14}\text{Mn}_2\text{O}_9$ | $P3$        | -1.3679                | $7\text{Na}_2\text{O} + 2\text{MnO}$                | -0.1459                |
| $\text{Na}_5\text{MnO}_4$             | $P2_1m$     | -1.5158                | $5/2\text{Na}_2\text{O} + 1/2\text{Mn}_2\text{O}_3$ | -0.1806                |
| $\text{Na}_4\text{Mn}_2\text{O}_5$    | $Fddd$      | -1.7528                | $2\text{Na}_2\text{O} + \text{Mn}_2\text{O}_3$      | -0.2005                |
| $\text{Na}_2\text{Mn}_3\text{O}_7$    | $P1$        | -1.8924                | $2\text{NaO}_2 + 3\text{MnO}$                       | -0.3356                |
| $\text{Na}_2\text{MnO}_4$             | $P63mc$     | -1.3423                | $\text{NaO}_2 + \text{NaMnO}_2$                     | -0.5142                |
| $\text{NaMn}_2\text{O}_4$             | $Pnam$      | -2.1028                | $\text{NaO}_2 + 2\text{MnO}$                        | -0.4797                |
|                                       |             |                        | $1/2\text{Na}_2\text{O}_2 + \text{Mn}_2\text{O}_3$  | -0.2849                |
|                                       |             |                        | $1/2\text{Na}_2\text{O}_2 + \text{MnO}$             | -0.6086                |
| $\text{NaMnO}_2$                      | $C2m$       | -2.1365                | $1/2\text{Na}_2\text{O}_2 + \text{MnO}$             | -0.6086                |
| $\text{NaMn}_7\text{O}_{12}$          | $I2m$       | -2.2161                | $1/2\text{N}_2\text{O} + 1/2\text{Mn}_2\text{O}_3$  | -0.4033                |

Table S6. Oxygen chemical potential  $\Delta\mu_{\text{O}}(T, p)$  as increasing temperature  $T$  from 300 K to 1500 K with the experimental data of entropy  $S^\circ$ , enthalpy difference  $H^\circ(T) - H^\circ(T_r)$ , and  $H^\circ(T_r) - H^\circ(0) = 0.0899$  eV available from Ref. [2], where the reference temperature is  $T_r = 298.15$  K. Here,  $\Delta\mu_{\text{O}}(T, p)$  is evaluated at the pressure values of  $p = p_\circ = 1$  atm and  $p = 0.2$  atm, respectively.

| $T$     |        | $S^\circ$ | $H^\circ(T) - H^\circ(T_r)$ | $TS^\circ$ | $\Delta\mu_{\text{O}}(T, p_\circ)$ |         | $\frac{1}{2}k_{\text{B}}T \ln(p/p_\circ)$ | $\Delta\mu_{\text{O}}(T, p)$ |
|---------|--------|-----------|-----------------------------|------------|------------------------------------|---------|-------------------------------------------|------------------------------|
| (°C)    | (K)    | (J/mol·K) | (kJ/mol)                    | (kJ/mol)   | (kJ/mol)                           | (eV)    | (eV)                                      | (eV)                         |
| 25      | 298.15 | 205.148   | 0.000                       | 61.1649    | -26.2424                           | -0.2718 | -0.0207                                   | -0.2925                      |
| 26.85   | 300    | 205.330   | 0.054                       | 61.5990    | -26.4325                           | -0.2738 | -0.0208                                   | -0.2946                      |
| 126.85  | 400    | 213.873   | 3.026                       | 85.5492    | -36.9216                           | -0.3824 | -0.0277                                   | -0.4102                      |
| 226.85  | 500    | 220.695   | 6.085                       | 110.3475   | -47.7913                           | -0.4950 | -0.0347                                   | -0.5297                      |
| 326.85  | 600    | 226.454   | 9.245                       | 135.8724   | -58.9737                           | -0.6108 | -0.0416                                   | -0.6524                      |
| 426.85  | 700    | 231.470   | 12.500                      | 162.0290   | -70.4245                           | -0.7294 | -0.0485                                   | -0.7780                      |
| 526.85  | 800    | 235.925   | 15.838                      | 188.7400   | -82.1110                           | -0.8505 | -0.0555                                   | -0.9059                      |
| 626.85  | 900    | 239.937   | 19.244                      | 215.9433   | -94.0097                           | -0.9737 | -0.0624                                   | -1.0361                      |
| 726.85  | 1000   | 243.585   | 22.707                      | 243.5850   | -106.0990                          | -1.0989 | -0.0693                                   | -1.1683                      |
| 826.85  | 1100   | 246.930   | 26.217                      | 271.6230   | -118.3630                          | -1.2259 | -0.0763                                   | -1.3022                      |
| 926.85  | 1200   | 250.019   | 29.768                      | 300.0228   | -130.7874                          | -1.3546 | -0.0832                                   | -1.4378                      |
| 1026.85 | 1300   | 252.888   | 33.352                      | 328.7544   | -143.3612                          | -1.4849 | -0.0901                                   | -1.5750                      |
| 1126.85 | 1400   | 255.568   | 36.968                      | 357.7952   | -156.0736                          | -1.6165 | -0.0971                                   | -1.7136                      |
| 1226.85 | 1500   | 258.081   | 40.611                      | 387.1215   | -168.9153                          | -1.7495 | -0.1040                                   | -1.8536                      |

Table S7. Oxygen chemical potential  $\Delta\mu_{\text{O}}(T, p)$  as decreasing oxygen partial pressure  $p$  from  $10^9$  atm to  $10^{-9}$  atm at temperatures of  $T = 1100$  K and  $700$  K.

| $p$       |           | $\frac{1}{2}k_{\text{B}}T \ln(p/p_\circ)$ | $\Delta\mu_{\text{O}}(T, p)$ (eV) |         |
|-----------|-----------|-------------------------------------------|-----------------------------------|---------|
| (Pa)      | (atm)     | (eV)                                      | 1100 K                            | 700 K   |
| $10^{14}$ | $10^9$    | 0.9822                                    | -0.2438                           | 0.2528  |
| $10^{11}$ | $10^6$    | 0.6548                                    | -0.5711                           | -0.0746 |
| $10^8$    | $10^3$    | 0.3274                                    | -0.8985                           | -0.4020 |
| $10^5$    | $10^0$    | 0.0000                                    | -1.2259                           | -0.7294 |
| $10^2$    | $10^{-3}$ | -0.3274                                   | -1.5533                           | -1.0568 |
| $10^{-1}$ | $10^{-6}$ | -0.6548                                   | -1.8807                           | -1.3842 |
| $10^{-4}$ | $10^{-9}$ | -0.9822                                   | -2.2081                           | -1.7116 |

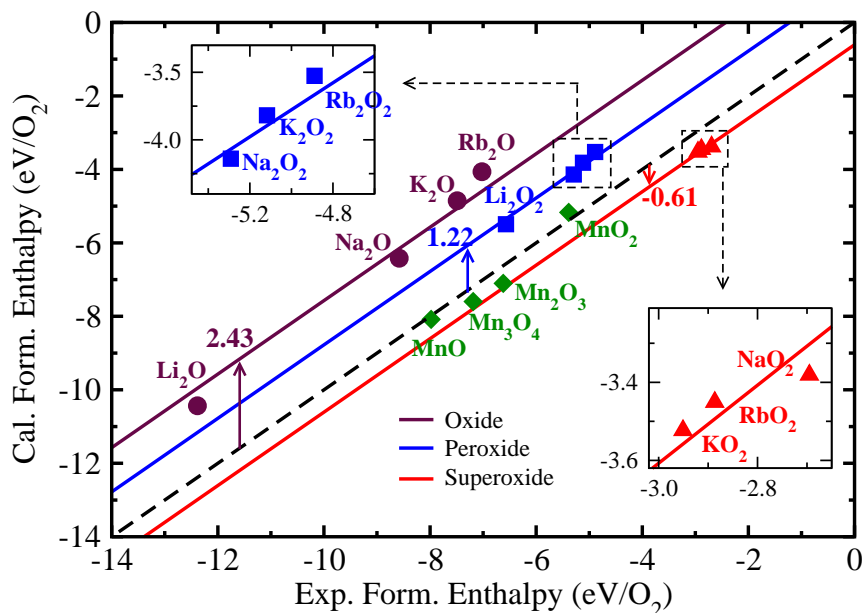

Figure S1. The calculated formation enthalpy versus experimental formation enthalpy for alkali metal oxides and manganese oxides. For alkali metal oxides, systematic differences are found, giving the correction energy for oxide formation energy  $E_{\text{oxd}}^{\text{cor}} = -0.61, 1.22,$  and  $2.43$  eV per  $\text{O}_2$  for superoxide, peroxide and oxide, respectively.

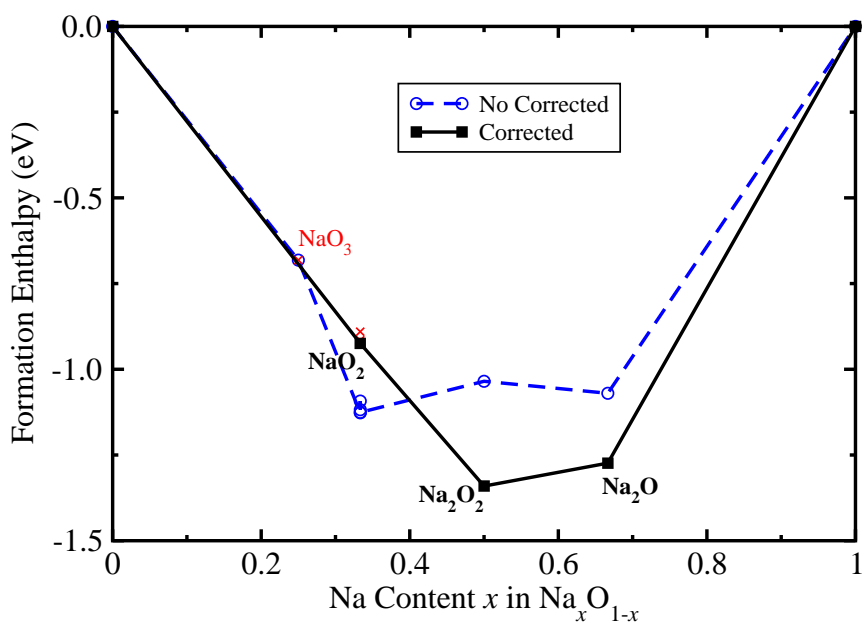

Figure S2. Convex hull plot of formation energies of the binary Na–O system. Red-colored dashed line is for the original formation energies, and black-colored solid line is for the formation energies corrected with  $E_{\text{oxd}}^{\text{cor}}$ .

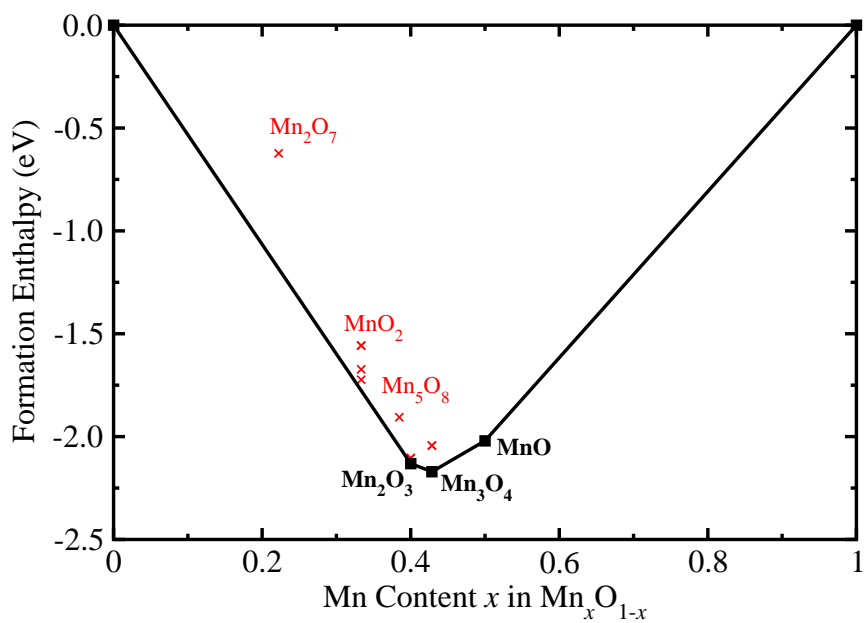

Figure S3. Convex hull plot of formation energies of the binary Mn–O system.

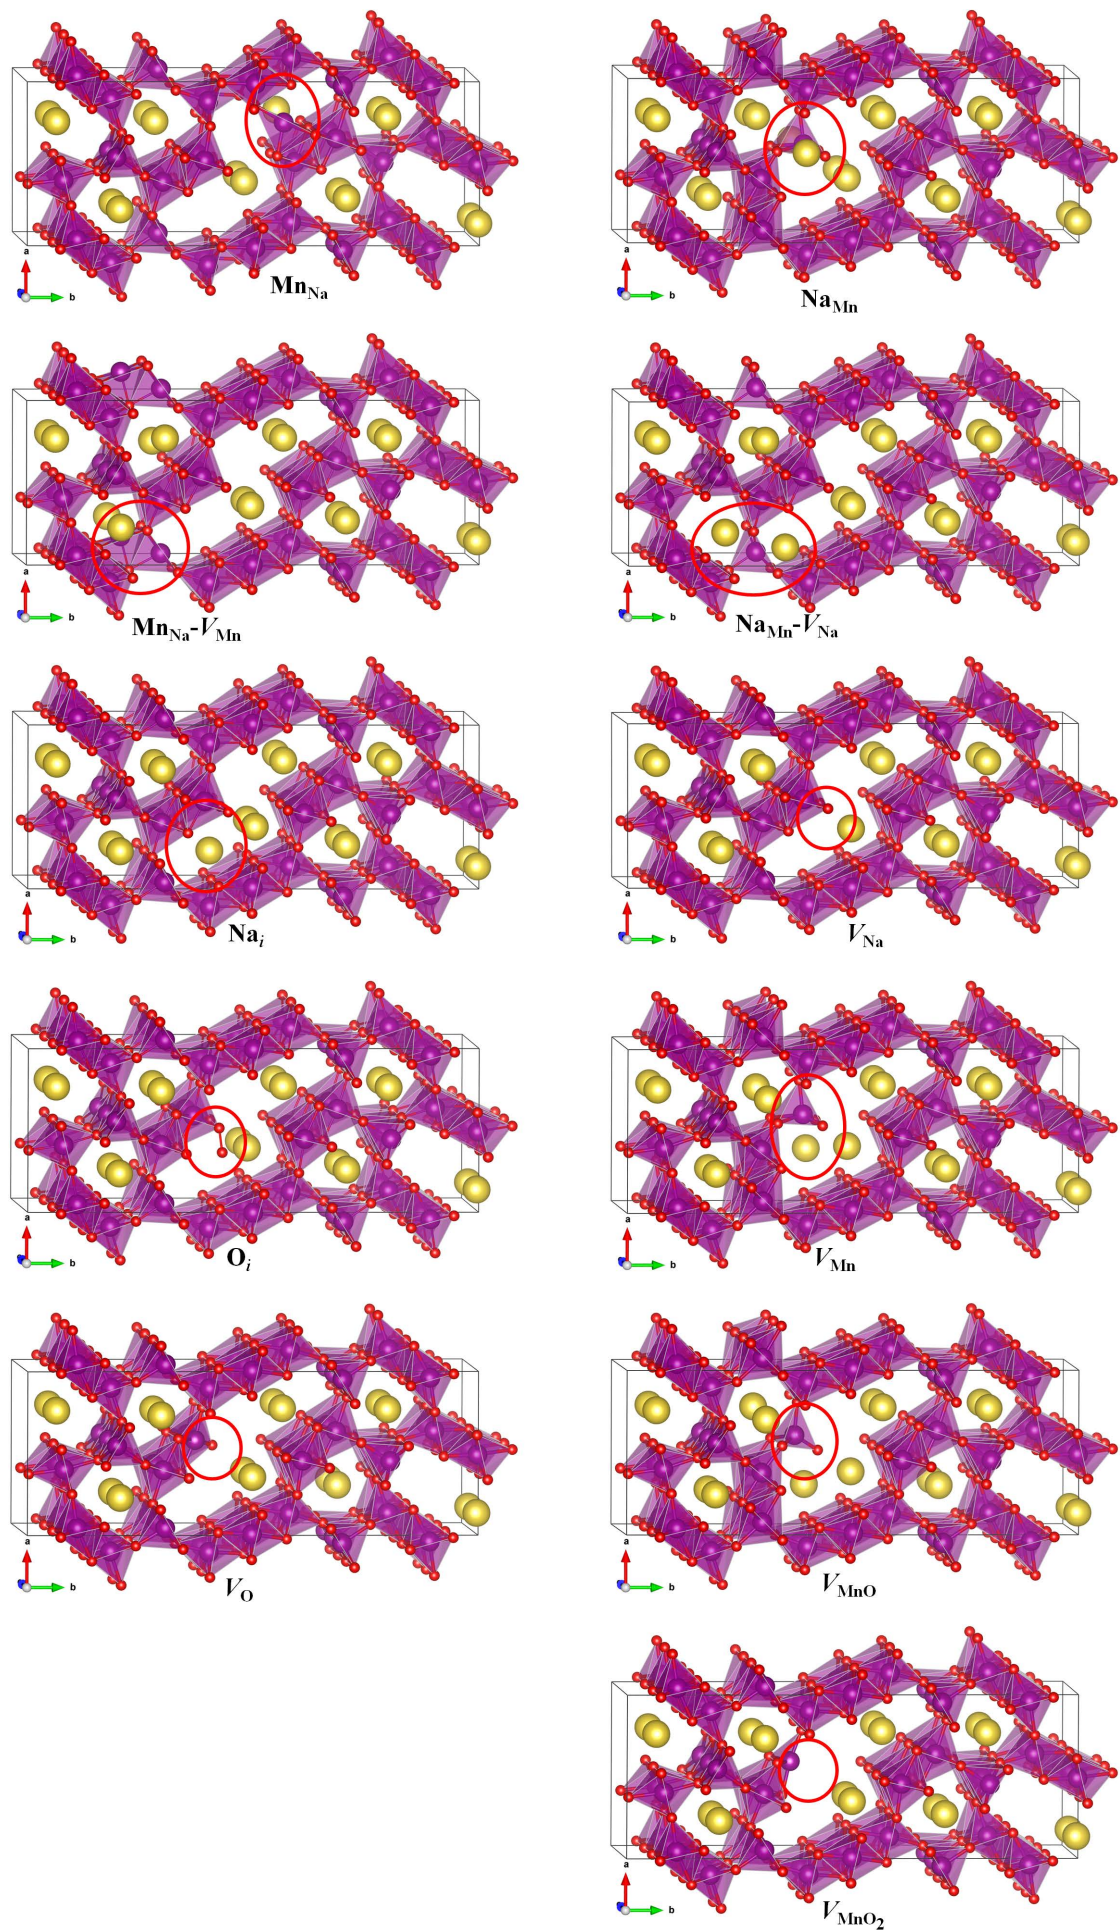

Figure S4. Polyhedral view of  $(1 \times 1 \times 2)$  supercell containing intrinsic point defects in  $\text{Na}_4\text{Mn}_9\text{O}_{18}$ .

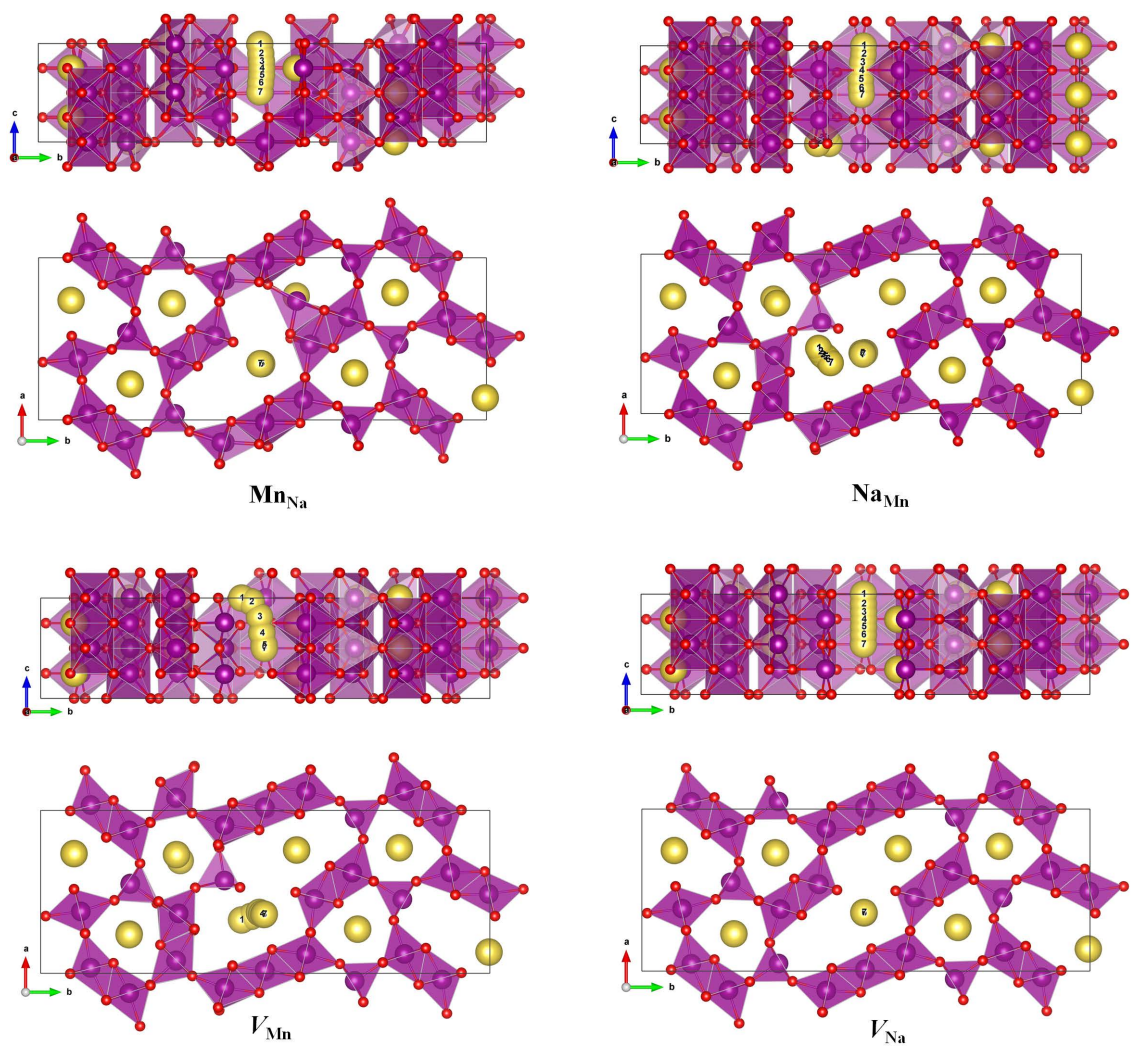

Figure S5. Polyhedral view for Na ion migration in  $(1 \times 1 \times 2)$  supercell containing intrinsic point defects, such as  $\text{Mn}_{\text{Na}}$ ,  $\text{Na}_{\text{Mn}}$ ,  $V_{\text{Mn}}$  and  $V_{\text{Na}}$ , in  $\text{Na}_4\text{Mn}_9\text{O}_{18}$ .



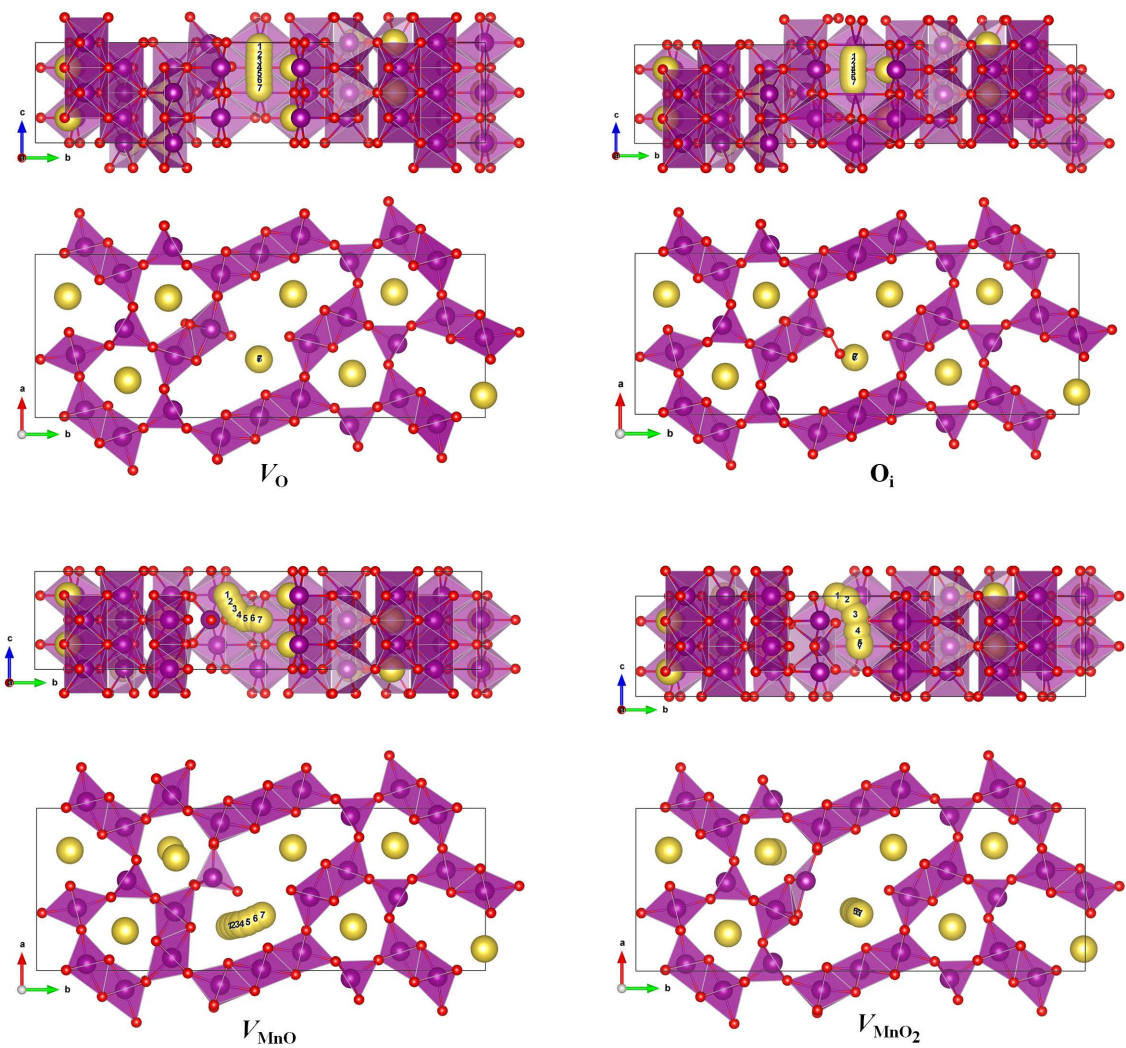

Figure S6. Polyhedral view for Na ion migration in  $(1 \times 1 \times 2)$  supercell containing intrinsic point defects and defect complexes, such as  $V_O$ ,  $O_i$ ,  $V_{MnO}$  and  $V_{MnO_2}$ , in  $Na_4Mn_9O_{18}$ .

## References

- [1] M. W. Chase, Jr., *NIST-JANAF Thermochemical Tables*, Fourth Edition (J. Phys. Chem. Ref. Data, Monograph 9, 1998) pp. 11951.
- [2] *CRC Handbook of Chemistry and Physics*, Internet Version, D. R. Lide Ed.; CRC Press: <http://www.hbcpnetbase.com>, Boca Raton, FL (2005).
